# Supplementary material
Source: MDPI journal article supplement (https://www.mdpi.com/2073-4441/10/10/1391)
Supplement: s1 [file s1]

# Supplementary Materials: *Myriophyllum aquaticum*-Based Surface Flow Constructed Wetlands for Enhanced Eutrophic Nutrient Removal—A Case Study from Laboratory-Scale up to Pilot-Scale Constructed Wetland

Shugeng Feng <sup>1</sup>, Shengjun Xu <sup>1</sup>, Xupo Zhang <sup>1</sup>, Rui Wang <sup>1</sup>, Xiaona Ma <sup>1</sup>, Zhirui Zhao <sup>1,3</sup>, Guoqiang Zhuang <sup>1,2</sup>, Zhihui Bai <sup>1,2</sup> and Xuliang Zhuang <sup>\*,1,2</sup>

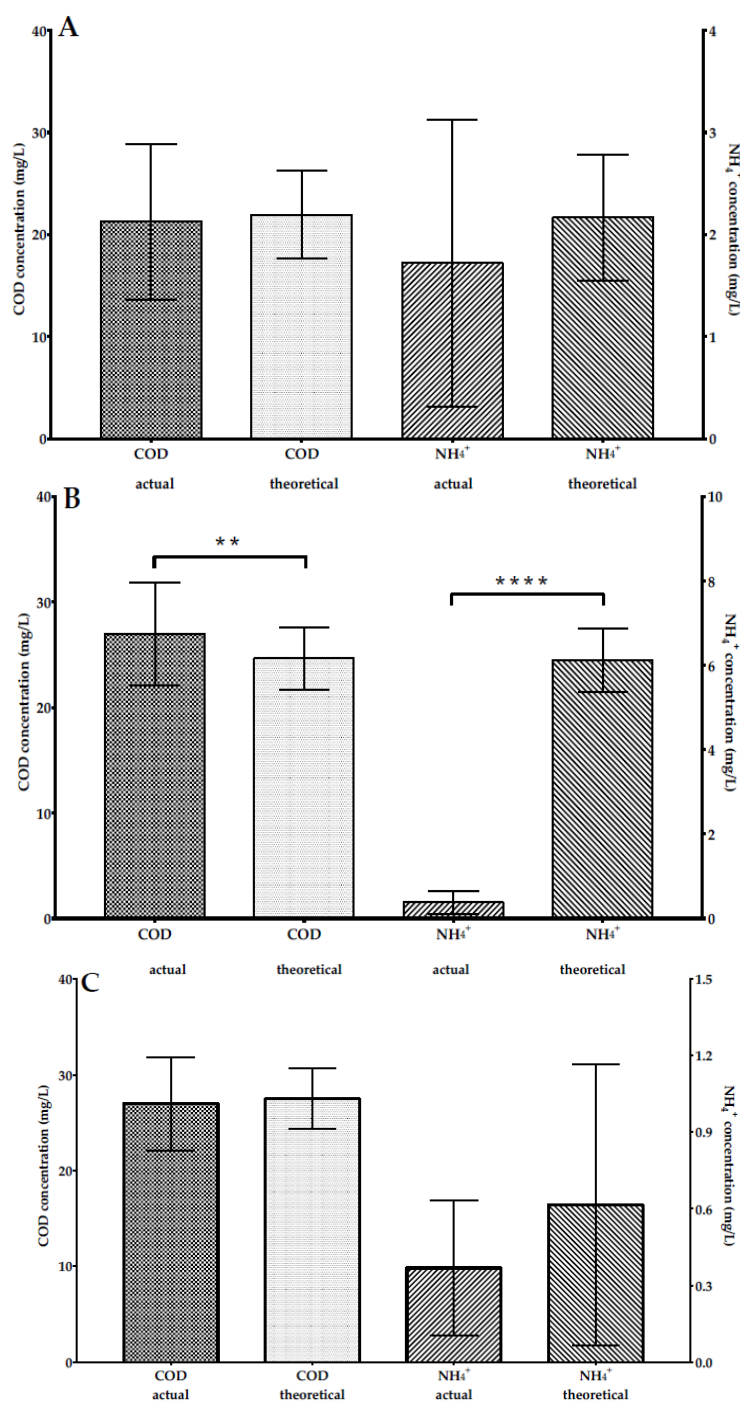

**Figure S1.** Comparison of theoretical and actual concentrations of COD and  $\text{NH}_4^+$  in the LSCW and the PSCW. Theoretical concentrations of COD and  $\text{NH}_4^+$  were predicted through the established Monod model equations for the LSCW and the PSCW. (A) shows the accuracy test of the LSCW model equations for representing the LSCW performance; (B) shows the significant difference between the theoretical prediction of the PSCW performance using the LSCW equations and the actual performance of the PSCW; (C) shows the accuracy test of the PSCW model equations for representing the PSCW performance. Paired *t*-testing was performed, and the statistical significance is presented as follows: \*  $P < 0.05$ , \*\*  $P < 0.01$ , \*\*\*  $P < 0.001$ , and \*\*\*\*  $P < 0.0001$ .
